# Supplementary material for: A new thinking: deciphering the aberrance and clinical implication of copper-death signatures in clear cell renal cell carcinoma
Source: PubMed Central journal article supplement (PMC9801655; doi:10.1186/s13578-022-00948-7), 2022-12-29

Figure S1

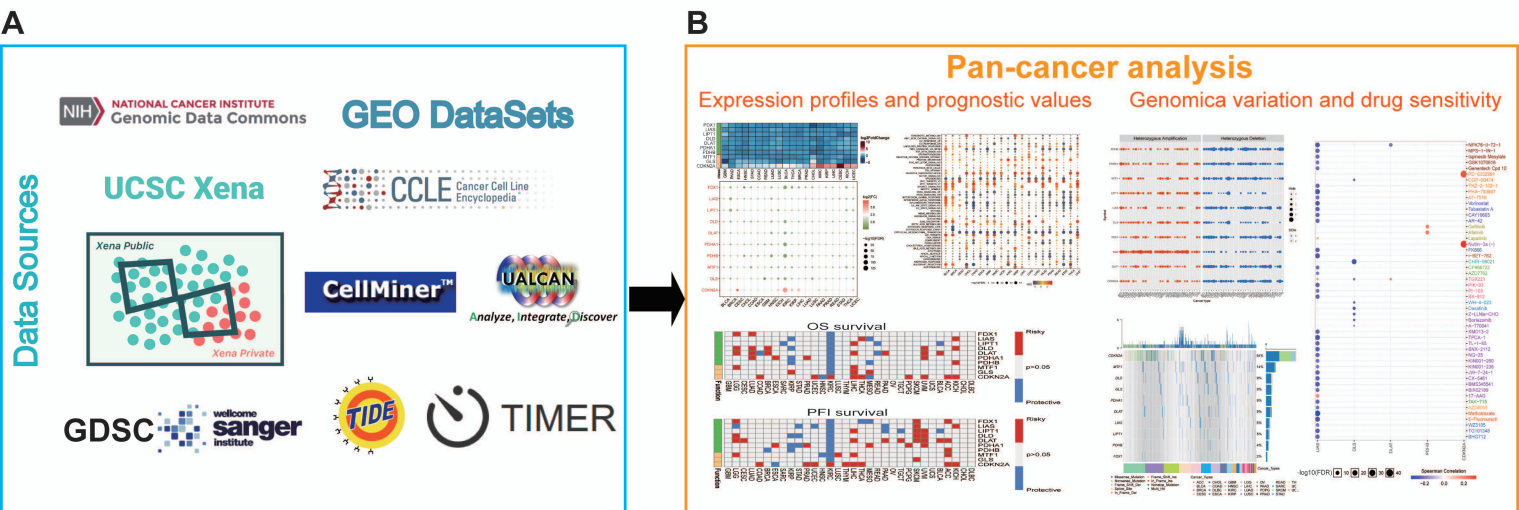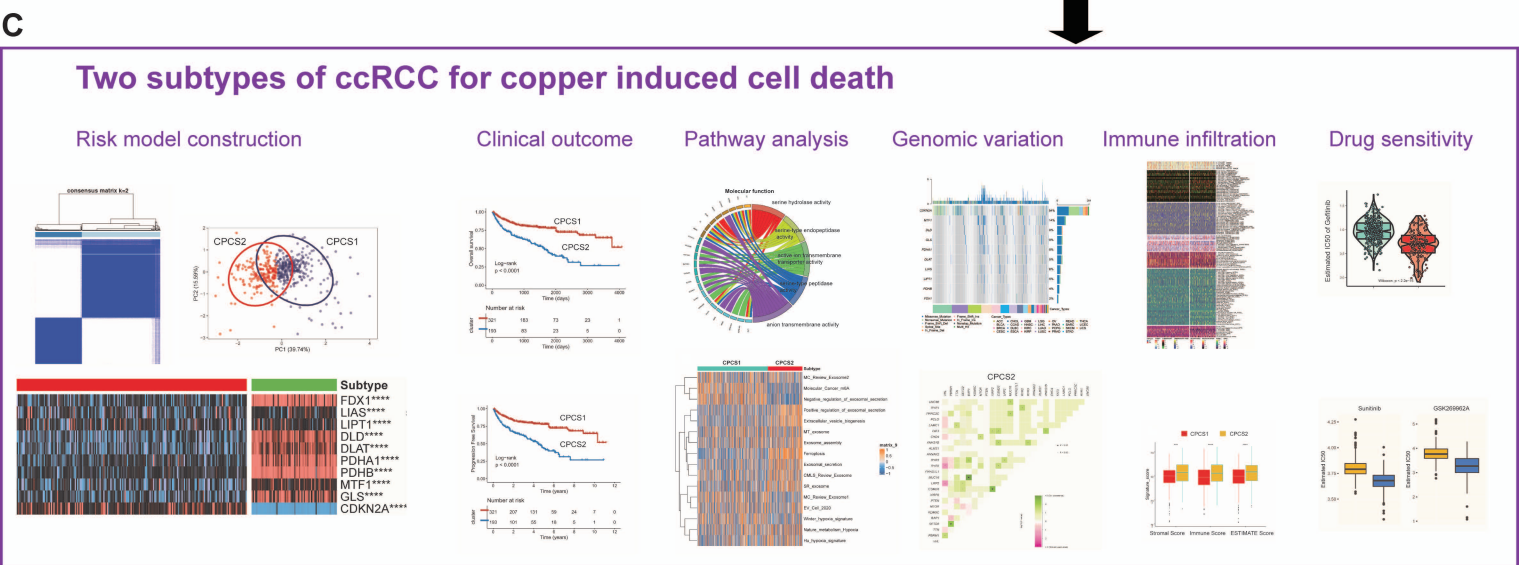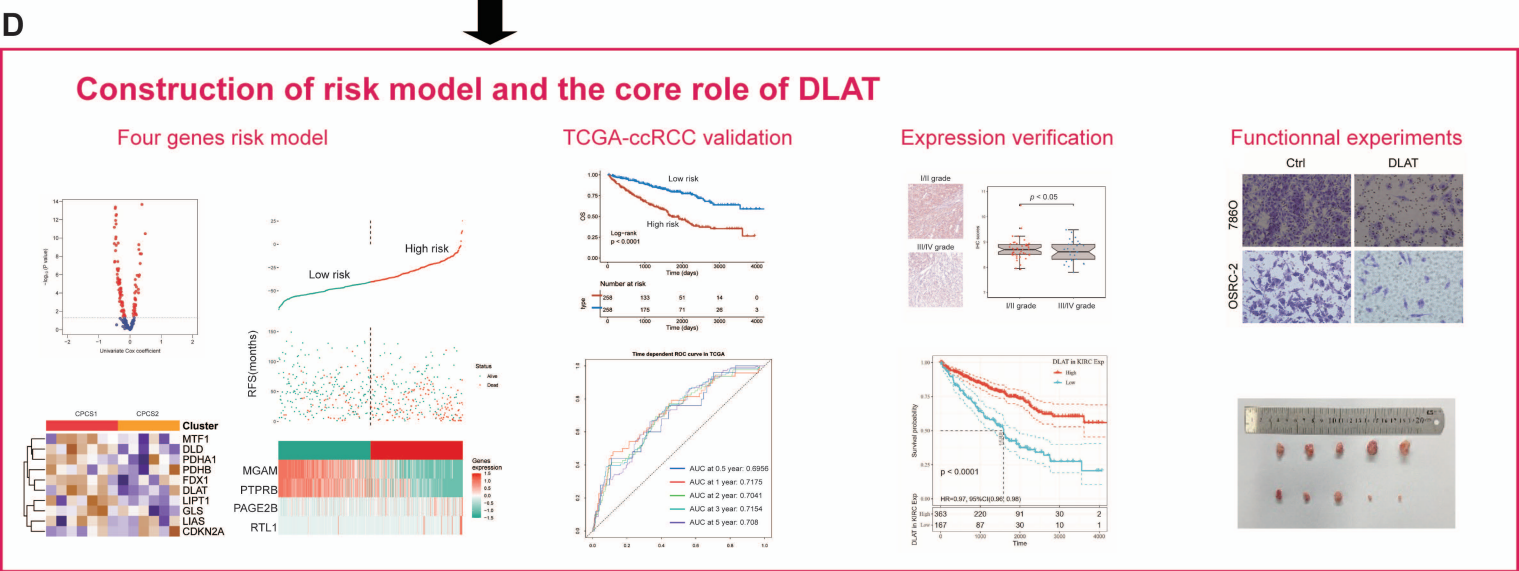

Figure S2

A

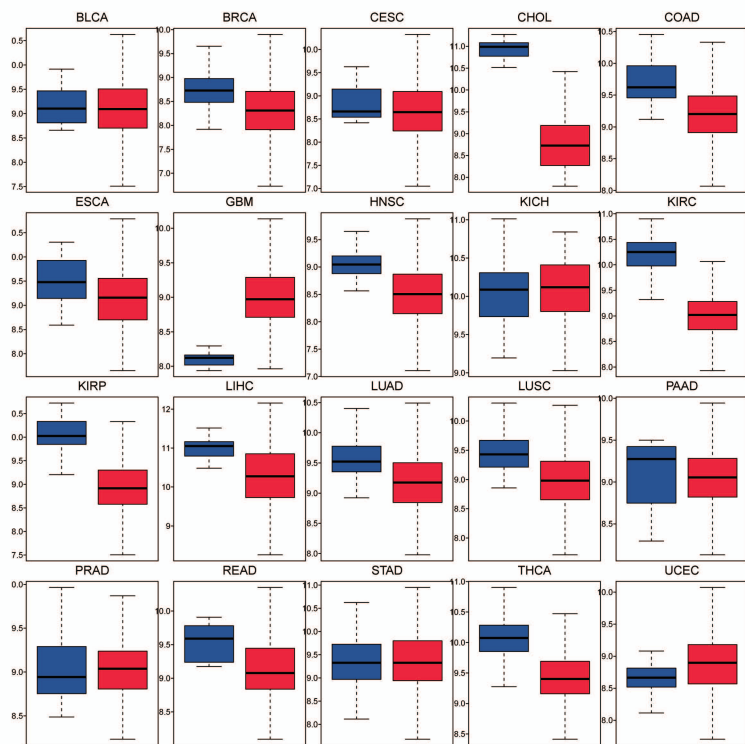

B

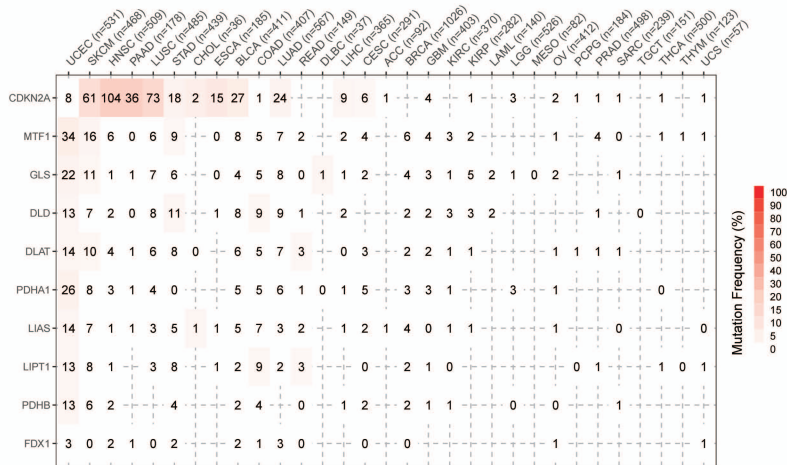

C

Overall survival difference between hypermethylation and hypomethylation.

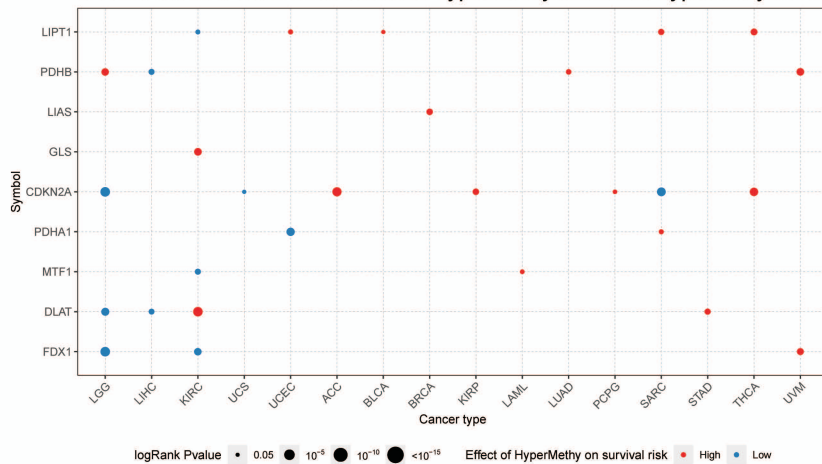

Figure S3

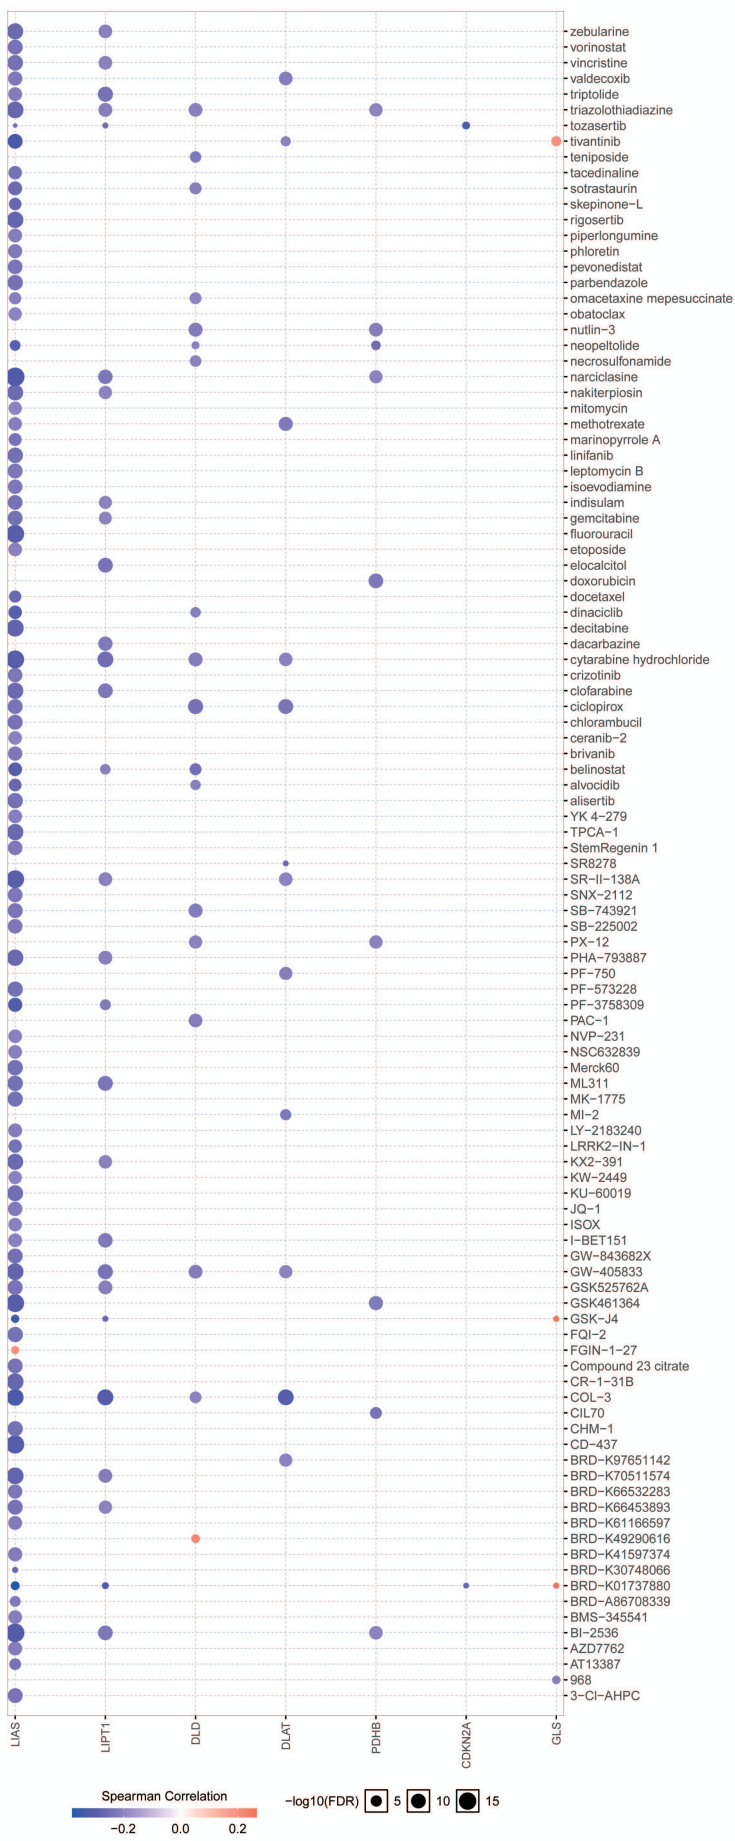



Figure S4

A

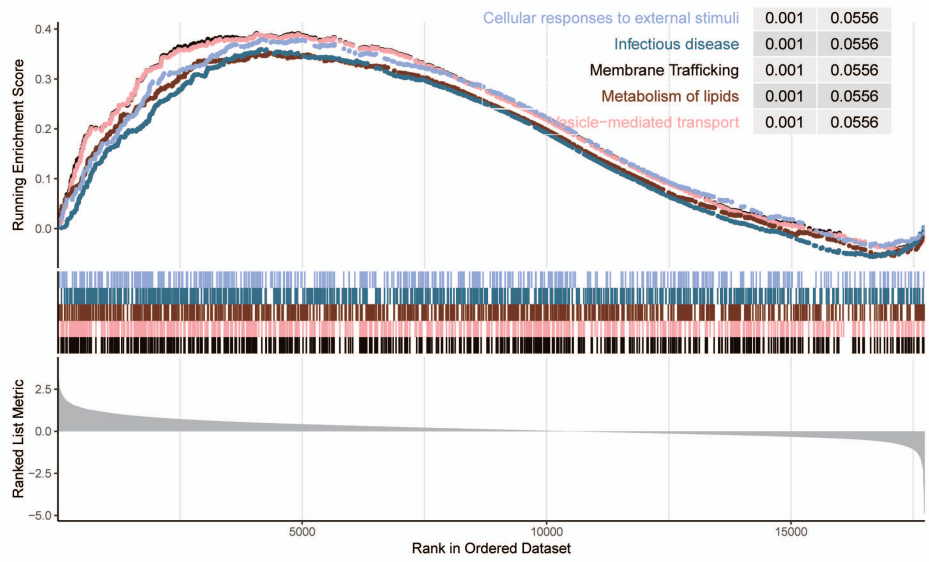

B

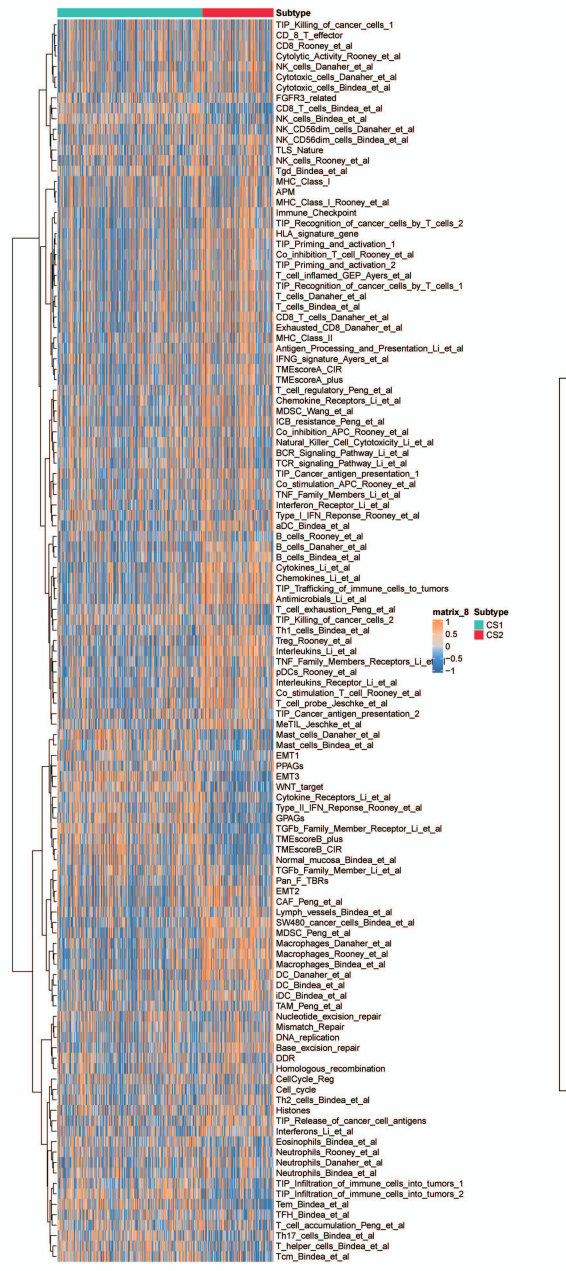

C

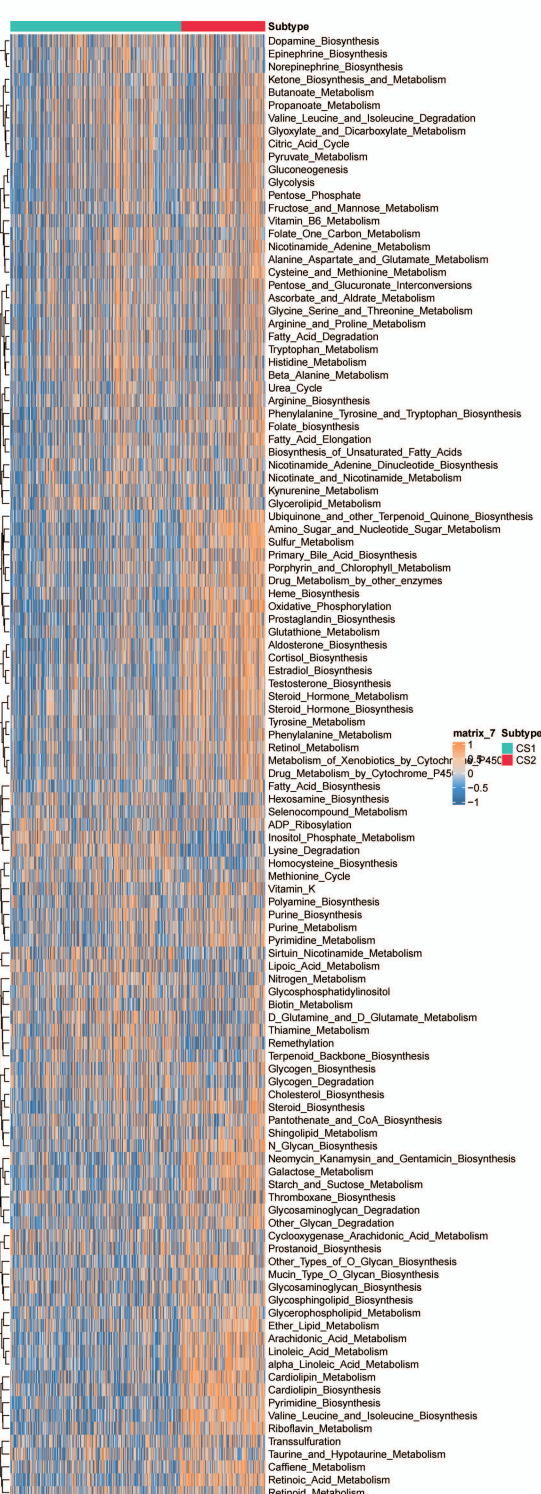



**Figure S5**

GLS, TYROTHRICIN  
Cor=-0.498, p<0.001

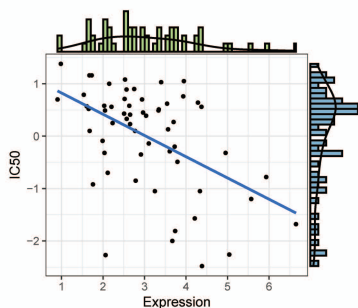

DLD, MI-503  
Cor=0.497, p<0.001

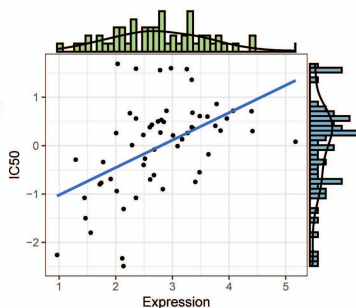

GLS, EMD-534085  
Cor=-0.494, p<0.001

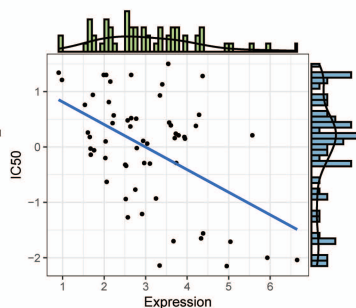

GLS, TAS-6417  
Cor=0.494, p<0.001

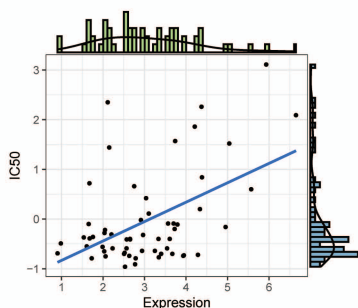

GLS, Barasertib  
Cor=-0.487, p<0.001

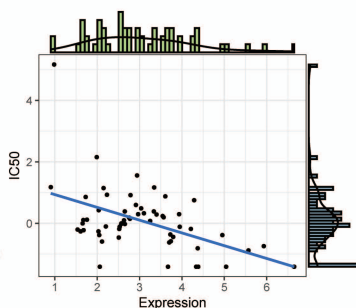

CDKN2A, LY-3154567  
Cor=0.478, p<0.001

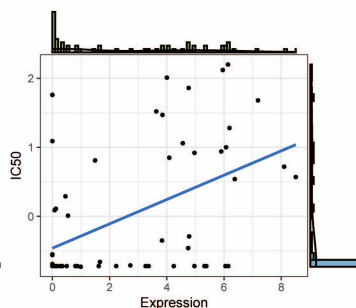

PDHA1, LY-3023414  
Cor=-0.477, p<0.001

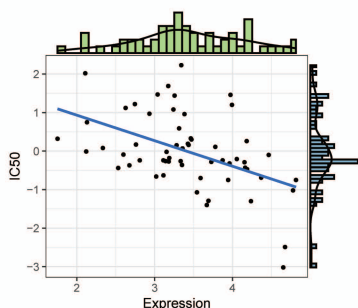

DLAT, KPT-9274  
Cor=0.474, p<0.001

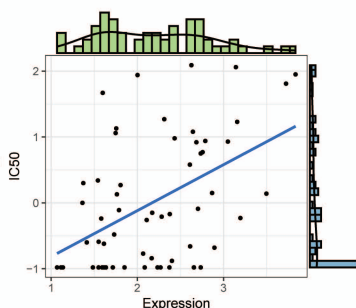

DLAT, RX-3117  
Cor=0.470, p<0.001

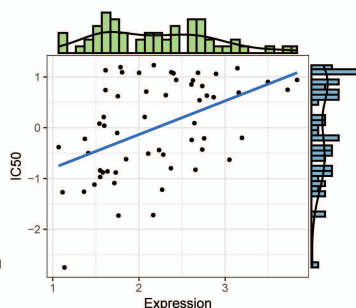

**B**

■ CPCS1 ■ CPCS2

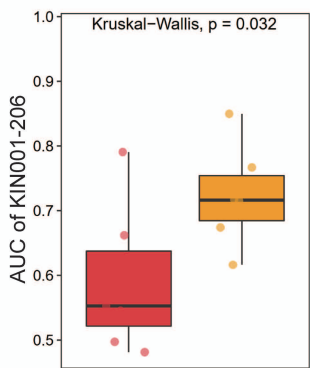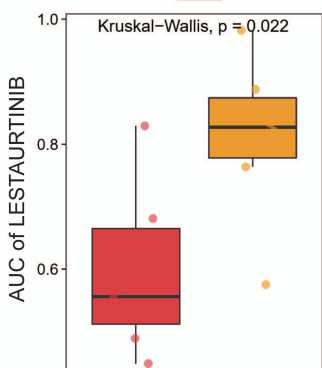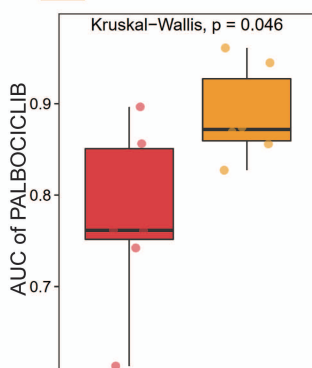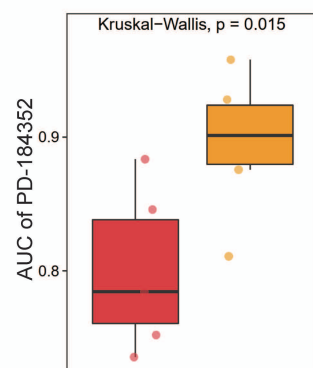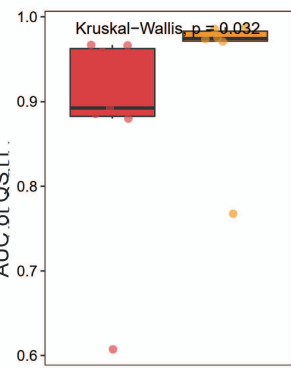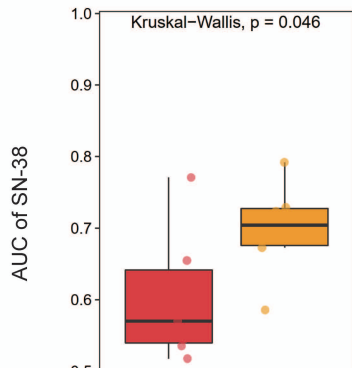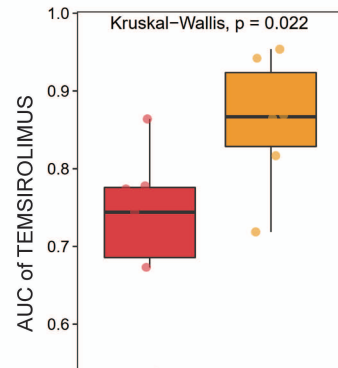

**Figure S6****A**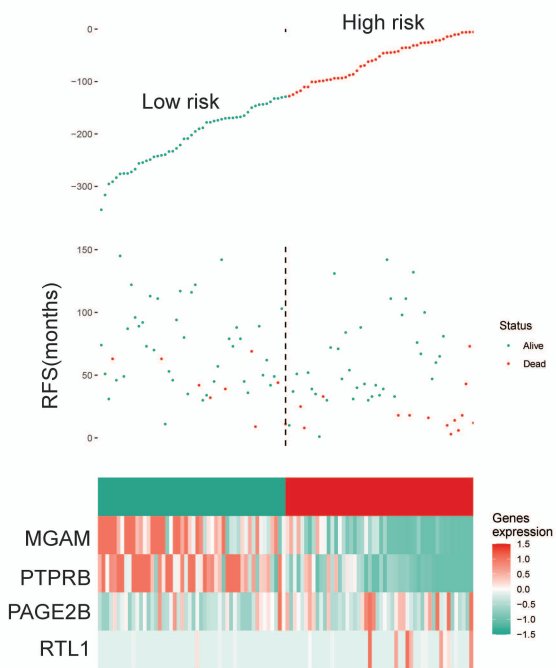**B**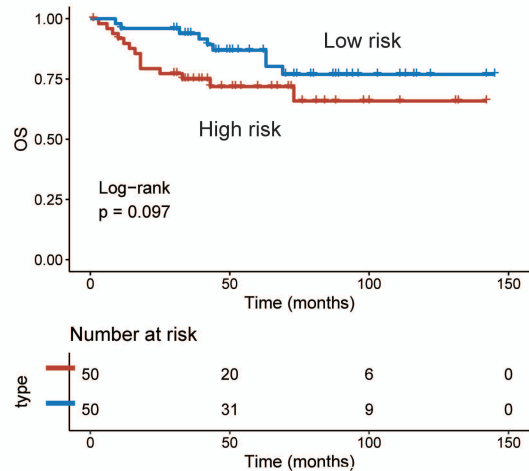**C**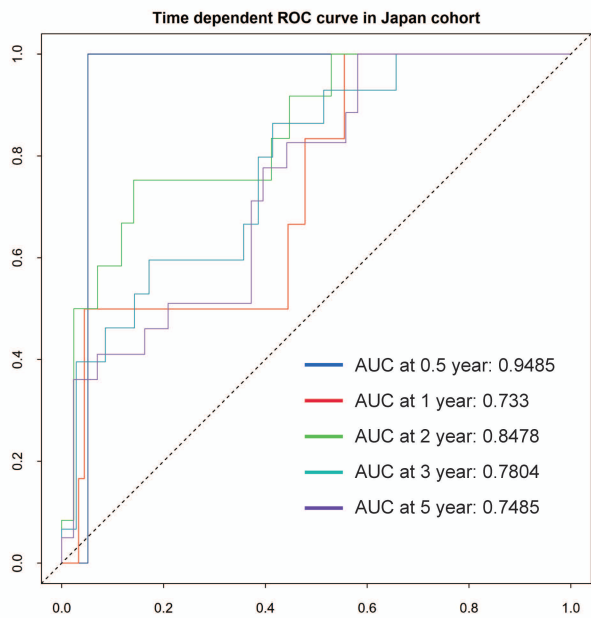

**Figure S7**

**A**

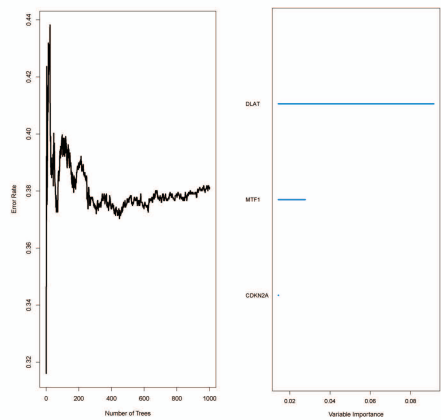

**B**

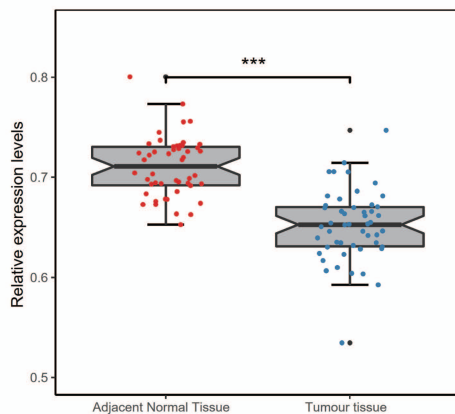

**C**

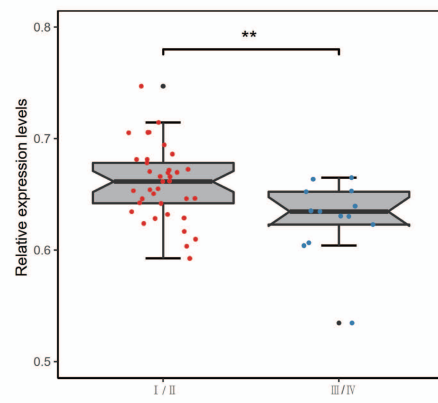

**D**

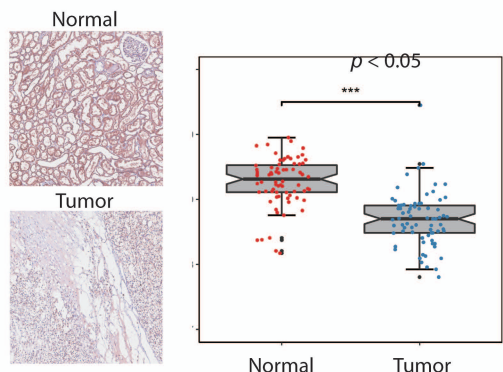

**F**

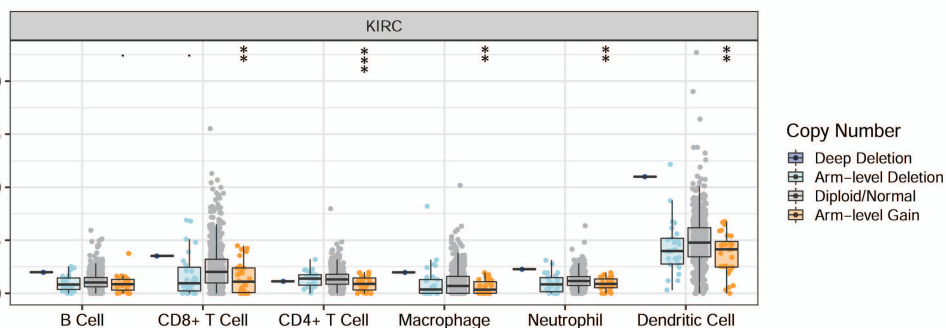

**E**

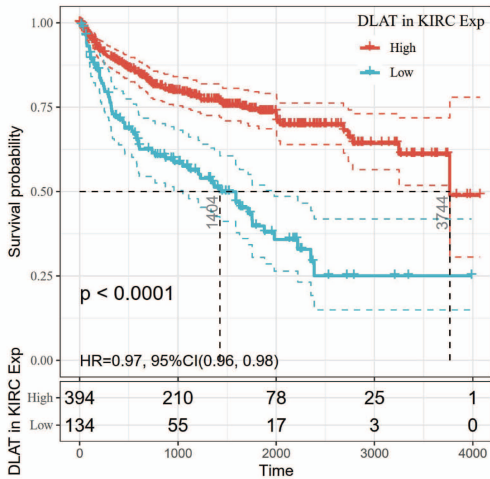

**G**

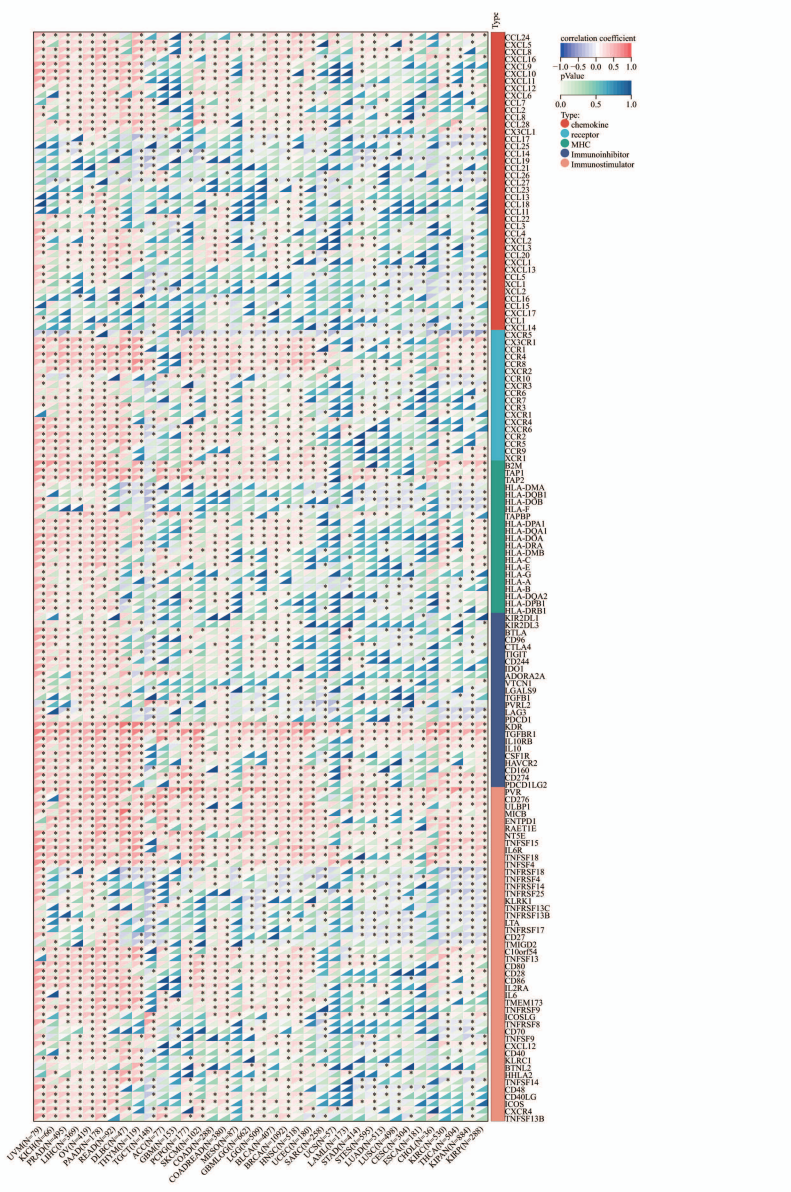



Figure S8

A

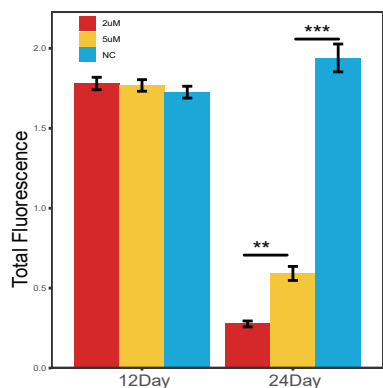

B

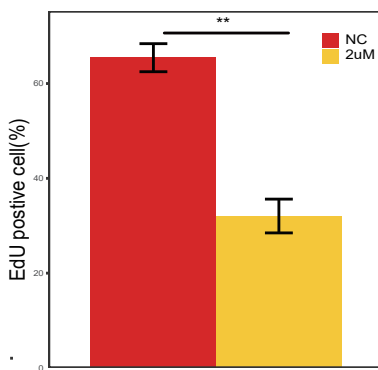

C

KIRC\_GSE159115

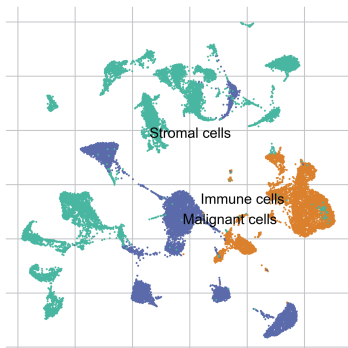

Celltype (malignancy)

- Immune cells
- Malignant cells
- Stromal cells

KIRC\_GSE159115

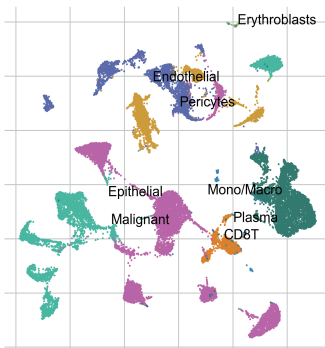

Celltype (major-lineage)

- CD8T
- Endothelial
- Epithelial
- Erythroblasts
- Malignant
- Mono/Macro
- Pericytes
- Plasma

Cuprotoxis Score

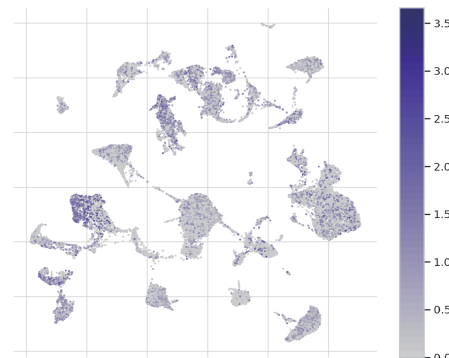

D

KIRC\_GSE171306

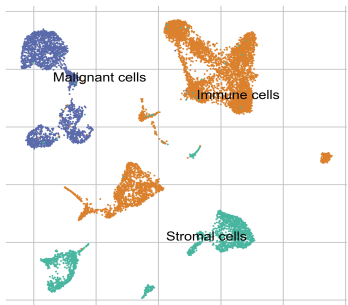

Celltype (malignancy)

- Immune cells
- Malignant cells
- Stromal cells

KIRC\_GSE171306

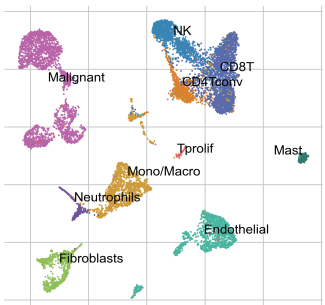

Celltype (major-lineage)

- CD4Tconv
- CD8T
- Endothelial
- Fibroblasts
- Malignant
- Mast
- Mono/Macro
- NK
- Neutrophils
- Tprolif

Cuprotoxis Score

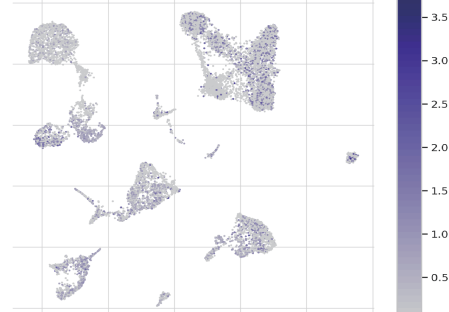

Figure S9

A

TCGA-KIRC cohort

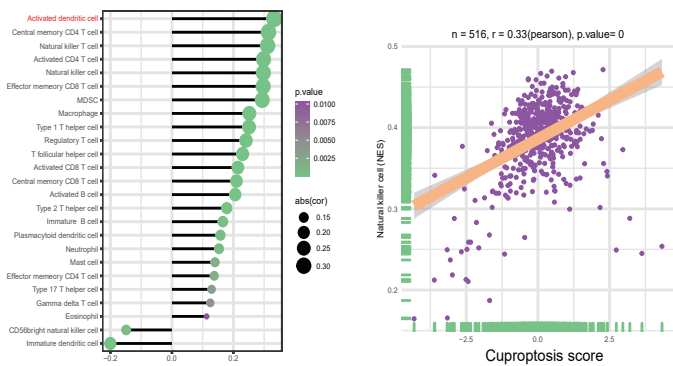

JAPAN-KIRC cohort

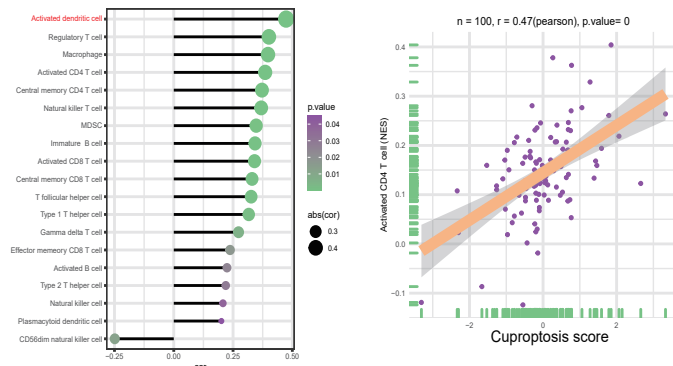

Cancer cell-KIRC cohort

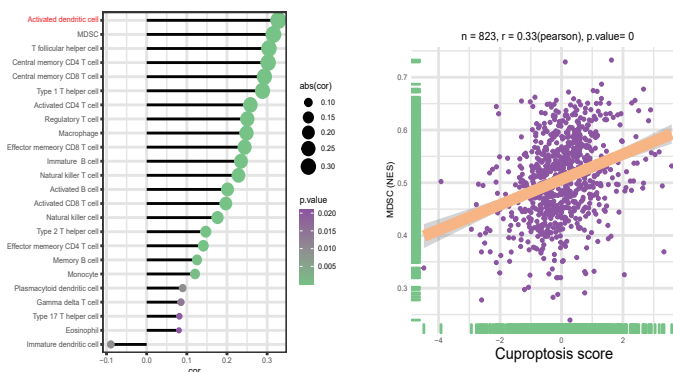

B

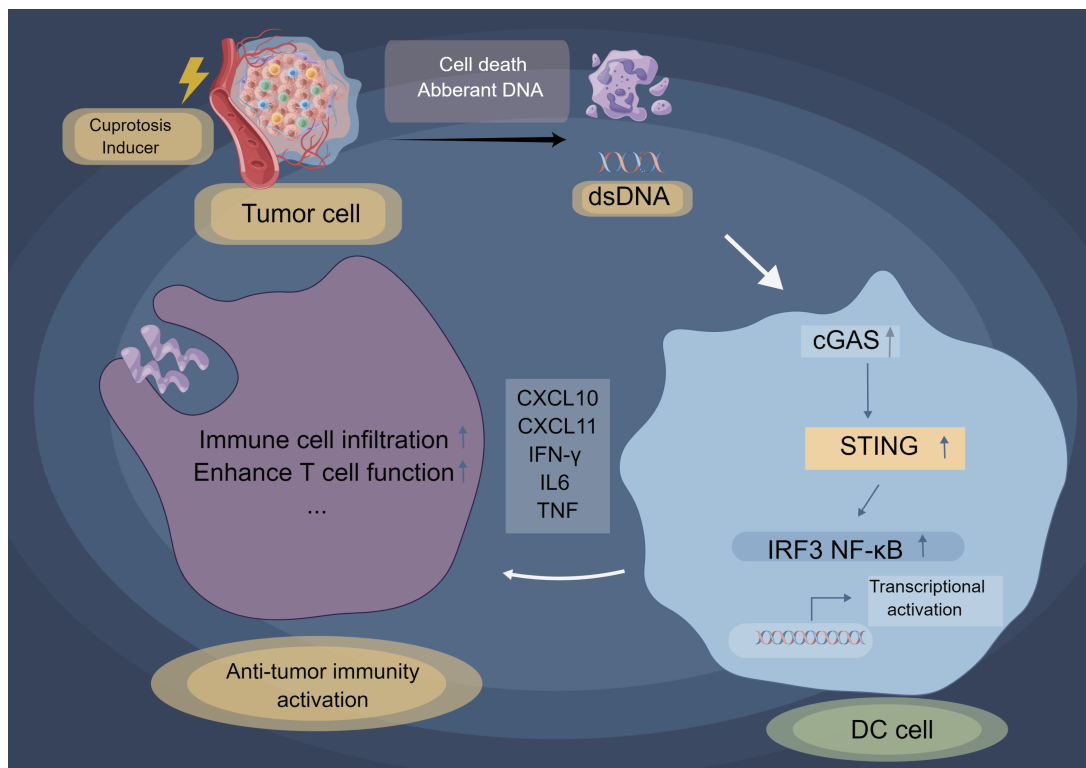

Supplement: 13578_2022_948_MOESM1_ESM.pdf [file 13578_2022_948_MOESM1_ESM.pdf]
